# Supplementary material for: Synergistic assembly of nanoparticle aggregates and texture nanosheets into hierarchical TiO2 core–shell structures for enhanced light harvesting in dye-sensitized solar cells
Source: Royal Society of Chemistry journal article supplement (doi:10.1039/c3ta10411g), 2013-01-01
Supplement: c3ta10411g.pdf [file c3ta10411g.pdf]

Electronic Supplementary Information (ESI) available for:

## **Synergistic assembly of nanoparticle aggregates and texture nanosheets into hierarchical TiO<sub>2</sub> core-shell structures for enhanced light harvesting in dye-sensitized solar cells†**

**Xiao Yu,<sup>a</sup> Hongmei Xu,<sup>a</sup> Ling Xin,<sup>a</sup> Xiaoyue Wang,<sup>a</sup> Yong Liu,<sup>\*a</sup> Xiang Zhou,<sup>a</sup> Baojun Li,<sup>a</sup> Wenxia Zhao,<sup>b</sup> and Hui Shen<sup>a,c</sup>**

<sup>a</sup>School of Physics and Engineering, State Key Laboratory of Optoelectronic Materials and Technologies, Sun Yat-sen University, Guangzhou 510275, China . Fax: +86-20-3933-2863; Tel: +86-20-3933-2866, E-mail: liuyong7@mail.sysu.edu.cn

<sup>b</sup>Instrumental Analysis and Research Center, Sun Yat-sen University, Guangzhou 510275, China

<sup>c</sup>Institute for Solar Energy Systems, Guangdong Provincial Key Laboratory of Photovoltaics Technologies, Guangzhou 510275, China

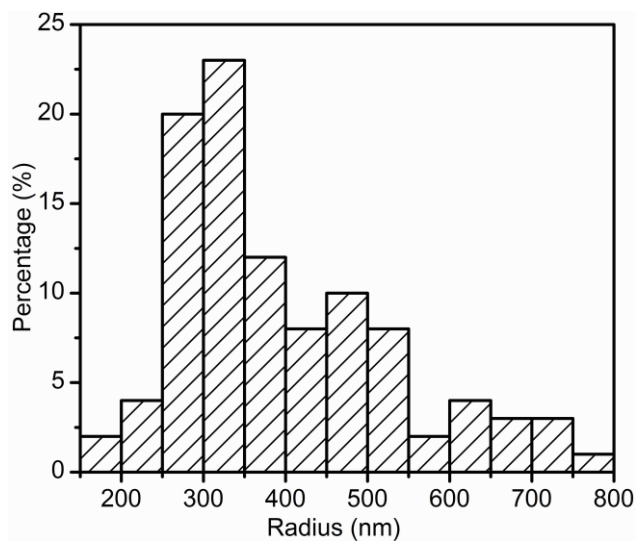

**Fig. S1** Histograms of radial distributions of HTCSSs.

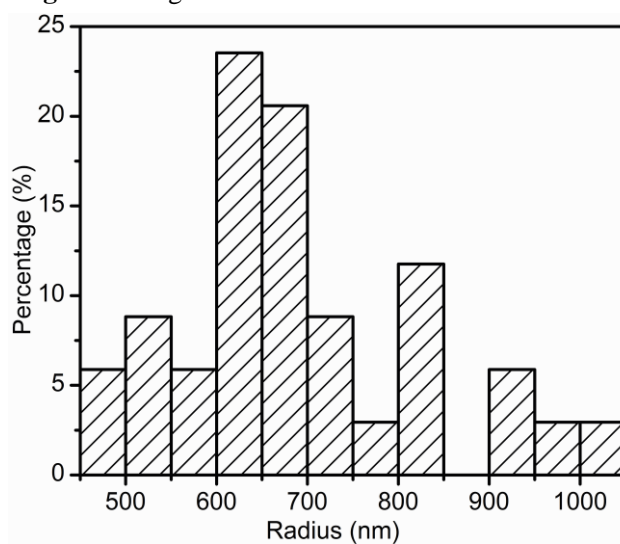

**Fig.S2** Histograms of radial distributions of TMSSs.

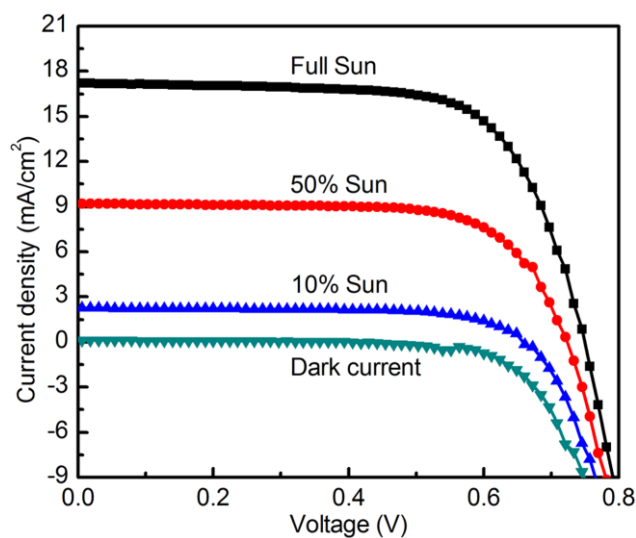

**Fig. S3** J-V characteristics of DSC made of HTCSS/P25 nanoparticle composite, measured under

various light intensities.

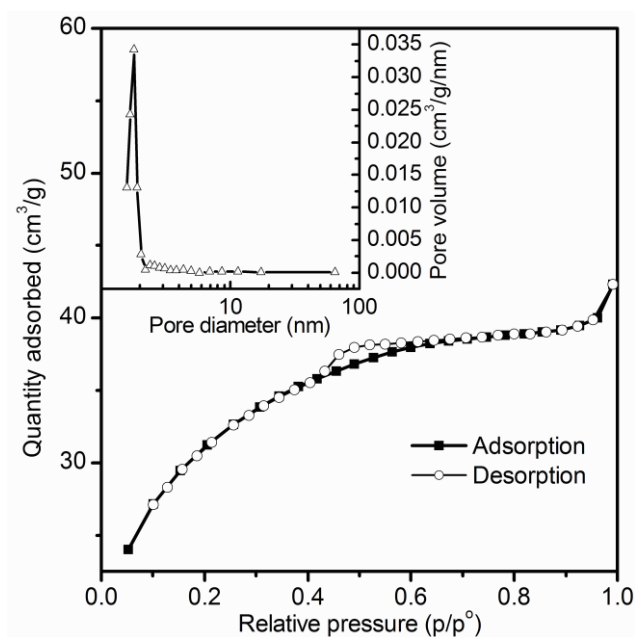

**Fig. S4** N<sub>2</sub> adsorption-desorption isotherms for the as-synthesized TMSS sample. The inset shows the corresponding pore size distribution.

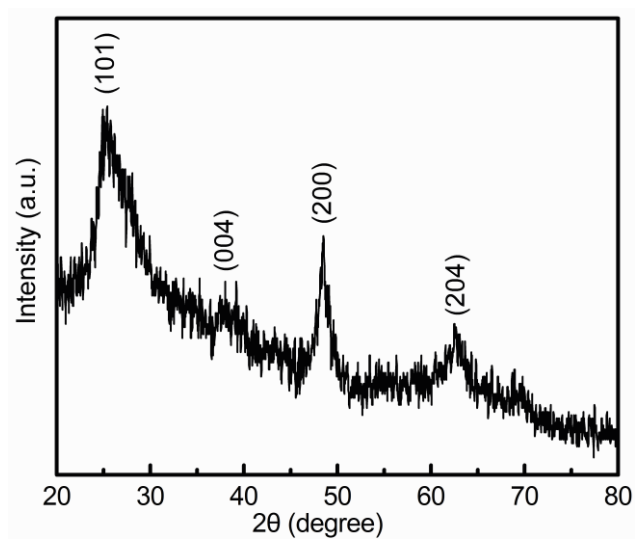

**Fig. S5** XRD patterns of as-prepared TMSS samples.

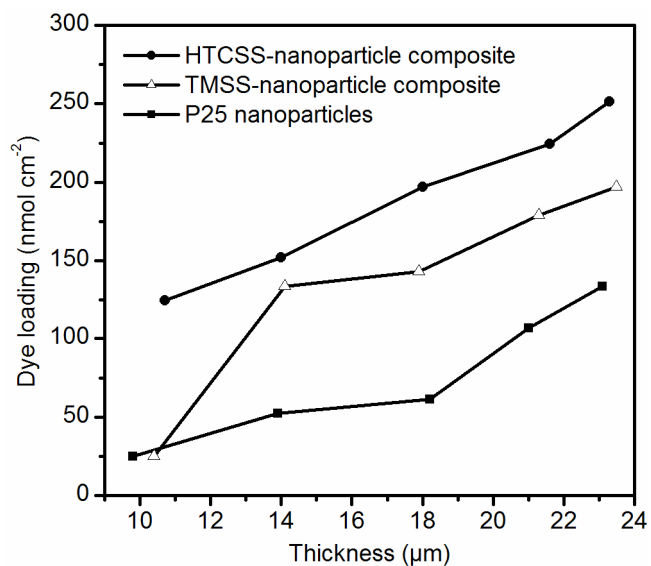

**Fig. S6** Relationship between the dye loading and the film thickness for HTCSS-nanoparticle composite, TMSS-nanoparticle composite and P25 nanoparticles.

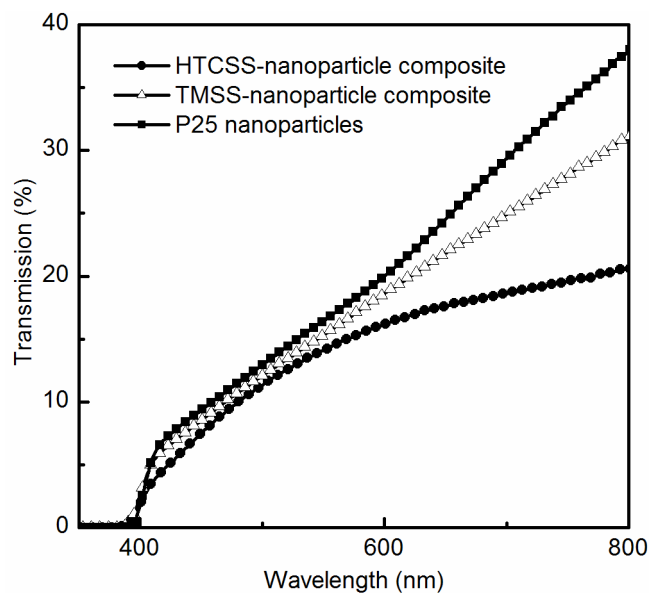

**Fig. S7** Transmittance spectra of the TiO<sub>2</sub> films prepared from HTCSS-nanoparticle composite, TMSS-nanoparticle composite and P25 nanoparticles of similar thicknesses.
